# Supplementary material for: Cognitive Efficiency and Fitness-to-Drive along the Lifespan: The Mediation Effect of Visuospatial Transformations
Source: MDPI journal article supplement (doi:10.3390/brainsci11081028), 2021-08-01
Supplement: s1 [file s1]

|                  | Young<br>(N = 61) | Middle-aged<br>(N = 56) | Older adults<br>(N = 58) |
|------------------|-------------------|-------------------------|--------------------------|
| Age, years       | 24.4 ± 4.55       | 52.2 ± 7.64             | 73.2 ± 6.72              |
| Education, years | 12.1 ± 2.44       | 11.3 ± 3.69             | 11.5 ± 3.68              |
| MoCA             | 25.7 ± 2.68       | 24.5 ± 2.72             | 22.5 ± 2.50              |
| MRT              | 21.9 ± 9.85       | 15.7 ± 8.16             | 11.4 ± 4.72              |
| PT               | 60.2 ± 50.2       | 90.2 ± 57.7             | 120 ± 52.9               |
| DT               | 75.2 ± 19.4       | 53.6 ± 21.8             | 26.4 ± 18.3              |
| RS               | 62 ± 26.4         | 48.3 ± 27               | 25.7 ± 21.5              |
| MS               | 63.5 ± 20.1       | 45.9 ± 21.2             | 34.3 ± 23                |
| ATAVT            | 59.3 ± 27.8       | 43 ± 27                 | 18.3 ± 20.2              |

**Table S1:** Means and Standard Deviations of variables used in path analysis for the three age groups. MoCA Montreal Cognitive Assessment, MRT Mental Rotation Test, PT Perspective Taking, DT Determination Test, RS Reaction Speed, MS Motor Speed; ATAVT Adaptive Tachistoscopic Traffic Perception Test.
